# Supplementary material for: Toxicity of Proton Therapy versus Photon Therapy on Salvage Re-Irradiation for Non-Small Cell Lung Cancer
Source: MDPI journal article supplement (doi:10.3390/life12020292), 2022-02-16
Supplement: s1 [file s1]

**Table S1.** Details of initial RT

| Variables                       | Total (N=63)  | XRT (n=41)    | PBT (n=22)    | p-value |
|---------------------------------|---------------|---------------|---------------|---------|
| <b>ECOG</b>                     |               |               |               |         |
| 0-1                             | 59 (93.7%)    | 40 (97.6%)    | 19 (86.4%)    | 0.118   |
| 2-3                             | 4 (6.3%)      | 1 (2.4%)      | 3 (13.6%)     |         |
| <b>FEV1, L</b>                  |               |               |               |         |
| Median (range)                  | 2.5 (0.8–3.7) | 2.5 (0.8–3.6) | 2.6 (1.2–3.7) | 0.974   |
| <b>DLCO, %</b>                  |               |               |               |         |
| Median (range)                  | 78 (41–135)   | 86 (41–135)   | 72.5 (44–120) | 0.050   |
| <b>Clinical stage</b>           |               |               |               |         |
| I–II                            | 13 (20.6%)    | 8 (19.5%)     | 5 (22.7%)     | 0.755   |
| III–IVa                         | 50 (79.4%)    | 33 (80.5%)    | 17 (79.3%)    |         |
| <b>Recurrence at initial RT</b> |               |               |               |         |
| 0                               | 58 (92.1%)    | 38 (92.7%)    | 29 (90.9%)    | 0.624   |
| 1 <sup>st</sup>                 | 4 (6.3%)      | 2 (4.9%)      | 2 (9.1%)      |         |
| 2 <sup>nd</sup> or more         | 1 (1.6%)      | 1 (2.4%)      | -             |         |
| <b>Aim of initial RT</b>        |               |               |               |         |
| Neoadjuvant                     | 9 (14.3%)     | 7 (17.1%)     | 2 (9.1%)      | 0.271   |
| Neoadjuvant + adjuvant          | 5 (7.9%)      | 4 (9.8%)      | 1 (4.5%)      |         |
| Definitive                      | 39 (61.9%)    | 22 (53.7%)    | 17 (77.3%)    |         |
| Adjuvant                        | 5 (7.9%)      | 5 (12.2%)     | -             |         |
| Salvage                         | 5 (7.9%)      | 3 (7.3%)      | 2 (9.1%)      |         |
| <b>CCRT</b>                     |               |               |               |         |
| No                              | 20 (31.7%)    | 10 (24.4%)    | 10 (45.5%)    | 0.099   |
| Yes                             | 43 (68.3%)    | 31 (75.6%)    | 12 (54.5%)    |         |
| <b>Initial RT technique</b>     |               |               |               |         |
| 3D                              | 34 (54.0%)    | 26 (63.4%)    | 8 (36.4%)     | 0.023   |
| IMRT                            | 21 (33.3%)    | 13 (31.7%)    | 8 (36.4%)     |         |
| SBRT                            | 2 (3.2%)      | 1 (2.4%)      | 1 (4.5%)      |         |
| 3DPT                            | 2 (3.2%)      | -             | 2 (9.1%)      |         |
| IMPT                            | 4 (6.3%)      | 1 (2.4%)      | 3 (13.6%)     |         |

**Table S2.** Dosimetry parameters and comparison between the patient groups according to the re-RT modality

| Variables                   | Total (N=63)  | XRT (N=41)    | PBT (N=22)    | p-value |
|-----------------------------|---------------|---------------|---------------|---------|
| <b>Initial RT</b>           |               |               |               |         |
| <b>BED<sub>10</sub>, Gy</b> | 78.7 ± 22.3   | 76.3 ± 23.7   | 83.1 ± 19.1   | 0.225   |
| <b>iCTV, cc</b>             | 184.6 ± 127.5 | 181.3 ± 135.5 | 190.7 ± 113.8 | 0.642   |
| <b>Lung</b>                 |               |               |               |         |
| Dmean, Gy                   | 9.7 ± 4.89    | 10.4 ± 5.1    | 8.3 ± 4.2     | 0.096   |
| V20, %                      | 17.7 ± 13.6   | 17.8 ± 10.1   | 17.6 ± 18.9   | 0.961   |
| V5, %                       | 39.4 ± 17.9   | 44.0 ± 17.5   | 30.7 ± 15.5   | 0.004   |
| <b>Esophagus</b>            |               |               |               |         |
| Dmax, Gy                    | 50.7 ± 19.2   | 51.0 ± 18.4   | 50.1 ± 21.0   | 0.854   |
| Dmean, Gy                   | 17.6 ± 11.6   | 19.3 ± 12.2   | 14.2 ± 9.7    | 0.096   |
| V50, %                      | 12.7 ± 16.4   | 14.8 ± 17.6   | 8.9 ± 13.4    | 0.172   |
| <b>Heart</b>                |               |               |               |         |
| Dmax, Gy                    | 51.4 ± 19.3   | 51.7 ± 16.8   | 50.9 ± 23.5   | 0.873   |
| Dmean, Gy                   | 90.3 ± 74.7   | 10.0 ± 7.8    | 7.3 ± 6.6     | 0.184   |
| V25, %                      | 14.0 ± 14.5   | 16.8 ± 15.7   | 8.9 ± 10.4    | 0.022   |
| <b>Re-RT</b>                |               |               |               |         |
| <b>BED<sub>10</sub>, Gy</b> | 87.0 ± 9.6    | 87.6 ± 21.1   | 85.6 ± 15.6   | 0.709   |
| <b>rCTV, cc</b>             | 83.1 ± 152.2  | 56.1 ± 51.4   | 133.6 ± 243.4 | 0.154   |
| <b>Lung</b>                 |               |               |               |         |
| Dmean, Gy                   | 4.7 ± 3.0     | 5.6 ± 3.1     | 3.0 ± 2.2     | 0.001   |
| V20, %                      | 7.8 ± 5.8     | 9.0 ± 6.2     | 5.7 ± 4.1     | 0.016   |
| V5, %                       | 22.9 ± 28.8   | 29.6 ± 33.5   | 10.2 ± 6.6    | 0.001   |

|                               |              |              |              |        |
|-------------------------------|--------------|--------------|--------------|--------|
| <b>Esophagus</b>              |              |              |              |        |
| Dmax, Gy                      | 43.8 ± 23.8  | 45.6 ± 23.6  | 40.4 ± 24.5  | 0.413  |
| Dmean, Gy                     | 9.4 ± 8.5    | 10.2 ± 8.1   | 8.1 ± 9.2    | 0.355  |
| V50, %                        | 6.2 ± 10.8   | 6.7 ± 11.5   | 5.3 ± 9.7    | 0.616  |
| <b>Heart</b>                  |              |              |              |        |
| Dmax, Gy                      | 33.5 ± 28.0  | 34.9 ± 27.4  | 30.8 ± 29.5  | 0.586  |
| Dmean, Gy                     | 3.7 ± 5.2    | 3.8 ± 4.7    | 3.5 ± 6.2    | 0.826  |
| V25, %                        | 4.8 ± 8.6    | 5.1 ± 9.3    | 4.3 ± 7.2    | 0.753  |
| <b>Cumulative calculation</b> |              |              |              |        |
| <b>BED<sub>10</sub>, Gy</b>   | 165.7 ± 31.5 | 164.0 ± 33.8 | 168.8 ± 27.0 | 0.565  |
| <b>Lung</b>                   |              |              |              |        |
| Dmean, Gy                     | 14.3 ± 6.0   | 15.9 ± 6.0   | 11.2 ± 4.9   | 0.003  |
| V20, %                        | 23.0 ± 11.9  | 26.6 ± 12.0  | 16.3 ± 8.3   | 0.001  |
| V5, %                         | 47.0 ± 19.0  | 54.1 ± 17.6  | 33.8 ± 14.1  | <0.001 |
| <b>Esophagus</b>              |              |              |              |        |
| Dmax, Gy                      | 86.6 ± 33.9  | 89.5 ± 33.4  | 81.2 ± 35.0  | 0.360  |
| Dmean, Gy                     | 26.4 ± 14.9  | 28.7 ± 15.7  | 22.0 ± 12.5  | 0.088  |
| V50, %                        | 23.5 ± 19.3  | 27.3 ± 20.2  | 16.5 ± 15.4  | 0.034  |
| V70, %                        | 10.4 ± 13.2  | 11.8 ± 14.1  | 7.8 ± 11.2   | 0.255  |
| <b>Heart</b>                  |              |              |              |        |
| Dmax, Gy                      | 80.7 ± 36.2  | 82.4 ± 30.3  | 77.5 ± 45.9  | 0.657  |
| Dmean, Gy                     | 14.3 ± 14.1  | 16.0 ± 15.9  | 11.1 ± 9.6   | 0.127  |
| V25, %                        | 19.1 ± 16.8  | 21.7 ± 17.8  | 14.2 ± 13.9  | 0.093  |
| V50, %                        | 7.6 ± 10.8   | 8.6 ± 12.2   | 5.7 ± 7.2    | 0.235  |

Abbreviations: XRT, X-ray beam therapy; PBT, proton beam therapy; RT, radiotherapy; BED<sub>10</sub>, biologically effective dose with an alpha-beta ratio of 10 Gy; iCTV, clinical target volume at initial RT; rCTV, clinical target volume at re-RT.

**Table S3.** Univariate analysis

| Variables                        | n  | Local progression-free survival |         | Overall survival |         |
|----------------------------------|----|---------------------------------|---------|------------------|---------|
|                                  |    | 2 years                         | p-value | 2 years          | p-value |
| <b>Total</b>                     | 63 | 51.6%                           |         | 46.8%            |         |
| <b>Age at re-RT</b>              |    |                                 | 0.073   |                  | 0.669   |
| <65 years                        | 33 | 57.7%                           |         | 51.6%            |         |
| ≥65 years                        | 30 | 45.4%                           |         | 38.2%            |         |
| <b>Sex</b>                       |    |                                 | 0.520   |                  | 0.194   |
| Female                           | 7  | 66.7%                           |         | 44.1%            |         |
| Male                             | 56 | 49.6%                           |         | 68.6%            |         |
| <b>Smoking</b>                   |    |                                 | 0.414   |                  | 0.464   |
| Non-smoker                       | 11 | 72.9%                           |         | 60.6%            |         |
| Current or Ex-smoker             | 52 | 47.0%                           |         | 44.2%            |         |
| <b>ECOG at re-RT</b>             |    |                                 | 0.694   |                  | 0.619   |
| 0-1                              | 60 | 49.5%                           |         | 46.1%            |         |
| 2                                | 3  | 100%                            |         | 66.7%            |         |
| <b>CCI</b>                       |    |                                 | 0.160   |                  | 0.052   |
| 1-2                              | 16 | 64.6%                           |         | 66.1%            |         |
| 3-7                              | 47 | 45.3%                           |         | 39.4%            |         |
| <b>Underlying COPD</b>           |    |                                 | 0.459   |                  | 0.911   |
| No                               | 51 | 53.9%                           |         | 48.8%            |         |
| Yes                              | 12 | 40.9%                           |         | 26.0%            |         |
| <b>Histology</b>                 |    |                                 | 0.030   |                  | 0.004   |
| SQ                               | 41 | 40.0%                           |         | 36.4%            |         |
| Non-SQ                           | 22 | 71.0%                           |         | 68.7%            |         |
| <b>Pneumonectomy/bilobectomy</b> |    |                                 | 0.540   |                  | 0.760   |
| No                               | 56 | 51.4%                           |         | 45.7%            |         |

|                                            |    |       |       |       |       |
|--------------------------------------------|----|-------|-------|-------|-------|
| Yes                                        | 7  | 53.3% |       | 51.4% |       |
| <b>FEV1 at re-RT</b>                       |    |       | 0.064 |       | 0.310 |
| <1.5 L                                     | 9  | 100%  |       | 29.6% |       |
| ≥1.5 L                                     | 32 | 47.3% |       | 52.2% |       |
| <b>DLCO at re-RT</b>                       |    |       | 0.751 |       | 0.004 |
| <60%                                       | 10 | 72.0% |       | 38.9% |       |
| ≥60%                                       | 23 | 53.5% |       | 74.6% |       |
| <b>Clinical stage at re-RT</b>             |    |       | 0.150 |       | 0.984 |
| I-II                                       | 29 | 36.3% |       | 48.1% |       |
| II-IV                                      | 34 | 61.1% |       | 44.9% |       |
| <b>Recurrence type</b>                     |    |       | 0.113 |       | 0.240 |
| In-field                                   | 38 | 39.5% |       | 44.3% |       |
| Marginal                                   | 25 | 62.9% |       | 49.6% |       |
| <b>Recurrence at re-RT</b>                 |    |       | 0.402 |       | 0.380 |
| 1 <sup>st</sup>                            | 56 | 48.4% |       | 47.8% |       |
| 2 <sup>nd</sup> or more                    | 7  | 68.6% |       | 40.0% |       |
| <b>Time interval between two RT course</b> |    |       |       |       | 0.290 |
| <16 months                                 | 35 | 40.6% | 0.056 | 40.9% |       |
| ≥16 months                                 | 28 | 65.3% |       | 55.6% |       |
| <b>CCRT at re-RT</b>                       |    |       | 0.409 |       | 0.774 |
| No                                         | 42 | 46.4% |       | 44.2% |       |
| Yes                                        | 21 | 60.0% |       | 51.3% |       |
| <b>Re-RT technique</b>                     |    |       | 0.757 |       | 0.541 |
| XRT                                        | 41 | 50.1% |       | 44.1% |       |
| PBT                                        | 22 | 55.1% |       | 55.3% |       |
| <b>BED<sub>10</sub> at re-RT</b>           |    |       | 0.729 |       | 0.414 |
| <80 Gy                                     | 32 | 54.1% |       | 39.6% |       |
| ≥80 Gy                                     | 31 | 48.8% |       | 56.2% |       |
| <b>rCTV</b>                                |    |       | 0.593 |       | 0.037 |
| <75 cc                                     | 42 | 54.1% |       | 54.8% |       |
| ≥75 cc                                     | 21 | 42.7% |       | 31.2% |       |
| <b>Cumulative BED<sub>10</sub></b>         |    |       | 0.933 |       | 0.926 |
| ≤160 Gy                                    | 37 | 52.1% |       | 46.0% |       |
| >160 Gy                                    | 26 | 51.5% |       | 49.5% |       |
| <b>Target – trachea location</b>           |    |       | 0.563 |       | 0.563 |
| Non-ultracentral                           | 43 | 45.8% |       | 45.8% |       |
| Ultracentral                               | 20 | 62.7% |       | 62.7% |       |
| <b>Target – bronchus location</b>          |    |       | 0.877 |       | 0.877 |
| Non-ultracentral                           | 43 | 49.6% |       | 49.6% |       |
| Ultracentral                               | 20 | 55.6% |       | 55.6% |       |
| <b>Target – esophagus location</b>         |    |       | 0.868 |       | 0.868 |
| Non-ultracentral                           | 52 | 50.4% |       | 50.4% |       |
| Ultracentral                               | 11 | 53.6% |       | 53.6% |       |

Abbreviations: RT, radiotherapy; SQ, squamous cell carcinoma; CCI, Charlson comorbidity index; COPD, chronic obstructive pulmonary disease; ECOG, Eastern Cooperative Oncology Group performance status; FEV1, the first second of forced expiration; DLCO, diffusing capacity of lung for carbon monoxide; CCRT, concurrent chemoradiation therapy; rCTV, clinical target volume at re-RT; BED<sub>10</sub>, biologically effective dose with alpha-beta ratio of 10 Gy

**Table S4.** Pulmonary and esophageal toxicities according to patient characteristics and dosimetric parameters

| Variables                                  | Lung       |            | p-value | Esophagus  |            | p-value          |
|--------------------------------------------|------------|------------|---------|------------|------------|------------------|
|                                            | Grades 0–2 | Grades 3–5 |         | Grades 0–2 | Grades 3–5 |                  |
| <b>Age at re-RT</b>                        |            |            | 0.894   |            |            | 0.411            |
| <65 years                                  | 30 (90.9%) | 3 (9.1%)   |         | 29 (87.9%) | 4 (12.1%)  |                  |
| ≥65 years                                  | 26 (86.7%) | 4 (13.3%)  |         | 29 (96.7%) | 1 (3.3%)   |                  |
| <b>Sex</b>                                 |            |            | 0.723   |            |            | 0.934            |
| Female                                     | 7 (100%)   | -          |         | 7 (100%)   | -          |                  |
| Male                                       | 49 (87.5%) | 7 (12.5%)  |         | 51 (91.1%) | 5 (8.9%)   |                  |
| <b>Smoking</b>                             |            |            | 0.446   |            |            | 1.000            |
| Non-smoker                                 | 11 (100%)  | -          |         | 10 (90.9%) | 1 (9.1%)   |                  |
| Current or Ex-smoker                       | 45 (86.5%) | 7 (13.5%)  |         | 48 (92.3%) | 4 (7.7%)   |                  |
| <b>ECOG at re-RT</b>                       |            |            | 0.805   |            |            | 1.000            |
| 0–1                                        | 53 (88.3%) | 7 (11.7%)  |         | 55 (91.7%) | 5 (8.3%)   |                  |
| 2                                          | 3 (100%)   | -          |         | 3 (100%)   | -          |                  |
| <b>CCI</b>                                 |            |            | 0.798   |            |            | 1.000            |
| 1–2                                        | 15 (93.8%) | 1 (6.3%)   |         | 15 (93.8%) | 1 (6.2%)   |                  |
| 3–7                                        | 41 (87.2%) | 6 (12.8%)  |         | 43 (91.5%) | 4 (8.5%)   |                  |
| <b>Underlying COPD</b>                     |            |            | 1.000   |            |            | 0.591            |
| No                                         | 45 (88.2%) | 6 (11.8%)  |         | 46 (90.2%) | 5 (9.8%)   |                  |
| Yes                                        | 11 (91.7%) | 1 (8.3%)   |         | 12 (100%)  | -          |                  |
| <b>Histology</b>                           |            |            | 0.963   |            |            | 1.000            |
| SQ                                         | 37 (90.2%) | 4 (9.8%)   |         | 38 (92.7%) | 3 (7.3%)   |                  |
| Non-SQ                                     | 19 (86.4%) | 3 (13.6%)  |         | 20 (90.9%) | 2 (9.1%)   |                  |
| <b>Pneumonectomy/bilobectomy</b>           |            |            | 1.000   |            |            | 0.161            |
| No                                         | 50 (89.3%) | 6 (10.7%)  |         | 53 (94.6%) | 3 (5.4%)   |                  |
| Yes                                        | 6 (85.7%)  | 1 (14.3%)  |         | 5 (71.4%)  | 2 (28.6%)  |                  |
| <b>FEV1 at re-RT</b>                       |            |            | 1.000   |            |            | 1.000            |
| <1.5 L                                     | 16 (84.2%) | 3 (15.8%)  |         | 18 (94.7%) | 1 (5.3%)   |                  |
| ≥1.5 L                                     | 21 (95.5%) | 1 (4.5%)   |         | 18 (81.8%) | 4 (18.2%)  |                  |
| <b>DLCO at re-RT</b>                       |            |            | 0.738   |            |            | 1.000            |
| <60%                                       | 8 (80.0%)  | 2 (20.0%)  |         | 9 (90.0%)  | 1 (10.0%)  |                  |
| ≥60%                                       | 21 (91.3%) | 2 (8.7%)   |         | 21 (91.3%) | 2 (8.7%)   |                  |
| <b>Clinical stage at re-RT</b>             |            |            | 1.000   |            |            | 0.454            |
| I–II                                       | 26 (89.7%) | 3 (10.3%)  |         | 28 (96.6%) | 1 (3.4%)   |                  |
| II–IV                                      | 30 (88.2%) | 4 (11.8%)  |         | 30 (88.2%) | 4 (11.8%)  |                  |
| <b>Recurrence type</b>                     |            |            | 0.820   |            |            | 0.645            |
| In-field                                   | 33 (86.8%) | 5 (13.2%)  |         | 34 (58.6%) | 4 (80.0%)  |                  |
| Marginal                                   | 23 (92%)   | 2 (8.0%)   |         | 24 (41.4%) | 1 (20.0%)  |                  |
| <b>Recurrence at re-RT</b>                 |            |            | 0.723   |            |            | 0.934            |
| 1 <sup>st</sup>                            | 49 (87.5%) | 7 (12.5%)  |         | 51 (91.1%) | 5 (8.9%)   |                  |
| 2 <sup>nd</sup> or more                    | 7 (100%)   | -          |         | 7 (100%)   | -          |                  |
| <b>Time interval between two RT course</b> |            |            | 0.448   |            |            | 0.794            |
| <16 months                                 | 30 (85.7%) | 5 (14.3%)  |         | 33 (94.3%) | 2 (5.7%)   |                  |
| ≥16 months                                 | 26 (92.9%) | 2 (7.1%)   |         | 25 (89.3%) | 3 (10.7%)  |                  |
| <b>Target – trachea location</b>           |            |            | 0.534   |            |            | 1.000            |
| Non-ultracentral                           | 37 (86.0%) | 6 (14.0%)  |         | 40 (93.0%) | 3 (7.0%)   |                  |
| Ultracentral                               | 19 (95.0%) | 1 (5.0%)   |         | 18 (90.0%) | 2 (10.0%)  |                  |
| <b>Target – bronchus location</b>          |            |            | 0.271   |            |            | 0.055            |
| Non-ultracentral                           | 40 (93.0%) | 3 (7.0%)   |         | 42 (97.7%) | 1 (2.3%)   |                  |
| Ultracentral                               | 16 (80.0%) | 4 (20.0%)  |         | 16 (80.0%) | 4 (20.0%)  |                  |
| <b>Target – esophagus location</b>         |            |            | 1.000   |            |            | <u>&lt;0.001</u> |
| Non-ultracentral                           | 46 (88.5%) | 6 (11.5%)  |         | 52 (100%)  | -          |                  |
| Ultracentral                               | 10 (90.9%) | 1 (9.1%)   |         | 6 (54.5%)  | 5 (45.5%)  |                  |
| <b>CCRT at re-RT</b>                       |            |            | 0.119   |            |            | <u>0.070</u>     |
| No                                         | 35 (83.3%) | 7 (16.7%)  |         | 41 (97.6%) | 1 (2.4%)   |                  |
| Yes                                        | 21 (100%)  | -          |         | 17 (81.0%) | 4 (19.0%)  |                  |
| <b>Re-RT technique</b>                     |            |            | 0.427   |            |            | 0.194            |

|                                   |              |              |              |              |              |                  |
|-----------------------------------|--------------|--------------|--------------|--------------|--------------|------------------|
| PBT                               | 21 (95.5%)   | 1 (4.5%)     |              | 21 (95.5%)   | 1 (4.5%)     | 0.810            |
| XRT                               | 35 (85.4%)   | 6 (14.6%)    |              | 37 (90.2%)   | 4 (9.8%)     |                  |
| rCTV, cc                          | 81.4 ± 158.6 | 97.0 ± 92.3  | 0.801        | 87.3 ± 157.7 | 34.6 ± 41.4  | 0.074            |
| BED <sub>10</sub> at re-RT, Gy    | 85.3 ± 16.3  | 100.3 ± 34.1 | 0.292        | 87.6 ± 19.9  | 79.9 ± 2.3   | <u>0.009</u>     |
| Re-RT fractions                   | 22.0 ± 9.5   | 14.0 ± 7.2   | <u>0.002</u> | 20.3 ± 9.4   | 30.8 ± 6.1   | <u>0.017</u>     |
| Re-RT fraction size, Gy           | 3.8 ± 3.0    | 6.7 ± 5.7    | 0.234        | 4.3 ± 3.5    | 2.2 ± 4.5    | <u>&lt;0.001</u> |
| Cumulative BED <sub>10</sub> , Gy | 164.4 ± 31.8 | 175.4 ± 28.6 | 0.387        | 167.6 ± 31.9 | 143.3 ± 11.7 | 0.098            |
| Lung, Dmean, Gy                   | 4.5 ± 2.9    | 6.4 ± 4.1    | 0.115        |              |              |                  |
| Lung, V20, %                      | 7.5 ± 5.4    | 10.4 ± 8.1   | 0.220        |              |              |                  |
| Lung, V5, %                       | 19.0 ± 13.0  | 24.7 ± 14.1  | 0.283        |              |              |                  |
| Lung, cumulative Dmean, Gy        | 14.1 ± 6.2   | 15.5 ± 4.8   | 0.682        |              |              |                  |
| Lung, cumulative V20, %           | 22.8 ± 12.2  | 24.8 ± 9.5   | 0.635        |              |              |                  |
| Lung, cumulative V5, %            | 46.6 ± 19.3  | 50.3 ± 18.3  | 0.865        |              |              |                  |
| Esophagus, Dmax, Gy               |              |              |              | 41.7 ± 23.8  | 67.2 ± 2.5   | <u>&lt;0.001</u> |
| Esophagus, Dmean, Gy              |              |              |              | 8.6 ± 8.1    | 19.0 ± 7.4   | <u>0.008</u>     |
| Esophagus, V50, %                 |              |              |              | 4.8 ± 9.7    | 21.8 ± 10.7  | <u>&lt;0.001</u> |
| Esophagus, cumulative Dmax, Gy    |              |              |              | 83.6 ± 33.3  | 123.5 ± 10.4 | <u>&lt;0.001</u> |
| Esophagus, cumulative Dmean, Gy   |              |              |              | 25.0 ± 14.4  | 42.2 ± 11.3  | <u>0.012</u>     |
| Esophagus, cumulative V50, %      |              |              |              | 22.3 ± 19.4  | 39.4 ± 9.2   | 0.057            |

Abbreviations: RT, radiotherapy; SQ, squamous cell carcinoma; CCI, Charlson comorbidity index; COPD, chronic obstructive pulmonary disease; ECOG, Eastern Cooperative Oncology Group performance status; FEV1, the first second of forced expiration; DLCO, diffusing capacity of lung for carbon monoxide; CCRT, concurrent chemoradiation therapy; rCTV, clinical target volume at re-RT; BED<sub>10</sub>, biologically effective dose with alpha-beta ratio of 10 Gy; 3D, three-dimensional conformal radiation therapy; IMRT, intensity-modulated radiotherapy; PBT, proton beam therapy; SBRT, stereotactic body radiotherapy
